# Supplementary material for: Clustering by multiple long-term conditions and social care needs: a cross-sectional study among 10 026 older adults in England
Source: HighWire-hosted journal article supplement (doi:10.1136/jech-2023-220696), 2023-08-23
Supplement: jech-2023-220696supp001_data_supplement.pdf [file jech-2023-220696supp001_data_supplement.pdf]

## Clustering by Multiple Long-Term Conditions and Social Care Needs: A cohort study amongst 10,026 older adults in England

Nusrat Khan<sup>1</sup>, Christos V. Chalitsios<sup>1</sup>, Yvonne Nartey<sup>1</sup>, Glenn Simpson<sup>1</sup>, Francesco Zaccardi<sup>2</sup>, Miriam Santer<sup>1</sup>, Paul Roderick<sup>1</sup>, Beth Stuart<sup>4</sup>, Andrew Farmer<sup>4</sup>, Hajira Dambha-Miller<sup>1</sup>

### Supplementary

**Supplementary Table 1.** List of 59 long-term conditions based on our previous works and consensus on defining multiple long-term conditions.

---

#### Long-term conditions

---

Stroke  
Coronary heart disease  
Heart failure  
Peripheral arterial disease  
Heart valve disorder  
Arrhythmia  
Venous thromboembolism  
Aneurysm  
Hypertension (Treated and untreated)  
Diabetes  
Addison's disease  
Cystic fibrosis  
Thyroid disorders  
COPD  
Asthma  
Bronchiectasis  
Parkinson's disease  
Epilepsy  
Multiple sclerosis  
Paralysis  
Transient ischaemic attack  
Peripheral neuropathy  
Chronic primary pain  
Solid organ cancer  
Haematological cancer  
Metastatic cancer  
Melanoma  
Benign cerebral tumours causing disability  
Dementia  
Schizophrenia  
Depression  
Anxiety  
Bipolar disorder  
Drug or alcohol misuse  
Eating disorder  
Autism

---

Post-traumatic stress disorder  
Connective tissue disorder  
Osteoarthritis  
Osteoporosis  
Gout  
Long-term musculoskeletal problem due to injury  
Chronic liver disease  
Inflammatory bowel  
Chronic pancreatic disease  
Peptic ulcer  
Chronic kidney disease  
End-stage kidney disease  
Endometriosis  
Chronic urinary tract infection  
Anaemia (including pernicious anaemia and sickle cell anaemia)  
Visual impairment that cannot be corrected  
Hearing impairment that cannot be corrected  
Meniere's disease  
HIV/AIDS  
Chronic lyme disease  
Tuberculosis  
Post-acute COVID-19 disease  
Chromosomal abnormalities  
Congenital heart disease

---

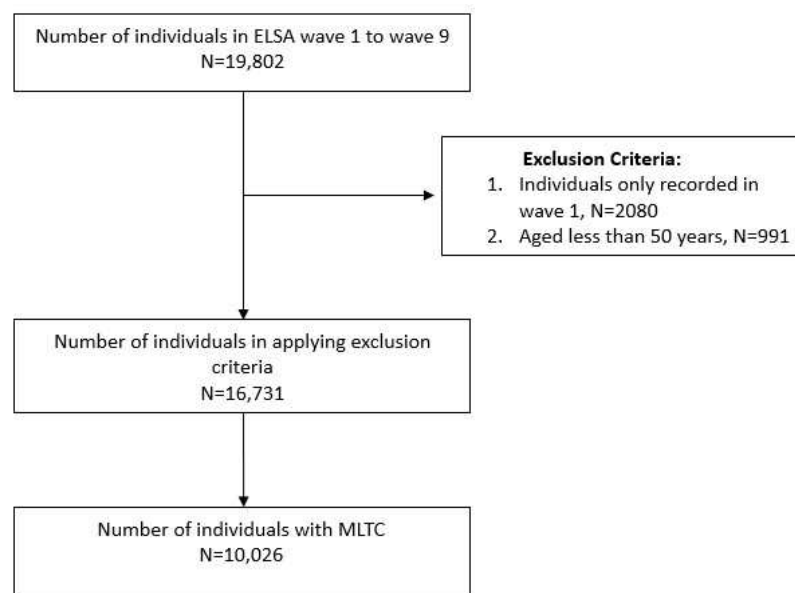

**Supplementary Figure 1.** Flow chart for the study population in ELSA.

**Supplementary Table 2:** Model fit and diagnostic criteria for competing latent class models.

|                  | LL       | BIC(LL)  | AIC(LL)  | Npar | df   | Classification Error | Dissimilarity index | Entropy R <sup>2</sup> |
|------------------|----------|----------|----------|------|------|----------------------|---------------------|------------------------|
| <b>1-Cluster</b> | -64952.8 | 130025.1 | 129931.7 | 13   | 8178 | 0                    | 0.40                | 1                      |
| <b>2-Cluster</b> | -61986.9 | 124221.9 | 124027.8 | 27   | 8164 | 0.0717               | 0.28                | 0.7401                 |
| <b>3-Cluster</b> | -61733.4 | 123843.6 | 123548.8 | 41   | 8150 | 0.0736               | 0.27                | 0.7999                 |
| <b>4-Cluster</b> | -61575.3 | 123656   | 123260.5 | 55   | 8136 | 0.1224               | 0.26                | 0.7194                 |
| <b>5-Cluster</b> | -61421.7 | 123377.6 | 122781.5 | 69   | 8122 | 0.1688               | 0.25                | 0.6751                 |
| <b>6-Cluster</b> | -61293.3 | 123449.3 | 122952.5 | 83   | 8108 | 0.2082               | 0.24                | 0.6605                 |

**Abbreviations:** AIC, Akaike Information Criterion; BIC, Bayesian Information Criterion; df, degrees of freedom; LL, Log Likelihood; Npar, Number of parameters

**Supplementary Table 3:** Item response probabilities (95%CI) of the clusters of multiple long-term conditions and social care needs.

| Cluster 1                |                    | Cluster 2                |                    | Cluster 3                |                    | Cluster 4                |                    | Cluster 5                |                    |
|--------------------------|--------------------|--------------------------|--------------------|--------------------------|--------------------|--------------------------|--------------------|--------------------------|--------------------|
| Condition/SCN            | Probability        |
| Hypertension             | 0.81 (0.75 - 0.86) | Difficulty with mobility | 0.85 (0.81 - 0.89) | Difficulty with mobility | 0.98 (0.94 - 0.99) | Difficulty with ADLs     | 0.98 (0.94 - 0.99) | Difficulty with ADLs     | 0.99 (0.92 - 1.00) |
| Mental health disorders  | 0.37 (0.33 - 0.41) | Arthritis                | 0.63 (0.59 - 0.66) | Arthritis                | 0.51 (0.47 - 0.55) | Arthritis                | 0.75 (0.72 - 0.77) | Difficulty with mobility | 0.98 (0.96 - 0.99) |
| Cardiovascular diseases  | 0.34 (0.31 - 0.38) | Mental health disorders  | 0.61 (0.58 - 0.64) | Health limit work        | 0.49 (0.44 - 0.55) | Hypertension             | 0.67 (0.65 - 0.69) | Health limit work        | 0.80 (0.74 - 0.85) |
| Difficulty with mobility | 0.25 (0.14 - 0.42) | Health limit work        | 0.46 (0.41 - 0.51) | Difficulty with ADLs     | 0.38 (0.32 - 0.44) | Mental health disorders  | 0.64 (0.62 - 0.66) | Hypertension             | 0.65 (0.59 - 0.70) |
| Arthritis                | 0.23 (0.20 - 0.27) | Cardiovascular diseases  | 0.37 (0.34 - 0.40) | Mental health disorders  | 0.36 (0.34 - 0.39) | Cardiovascular diseases  | 0.50 (0.48 - 0.52) | Arthritis                | 0.54 (0.48 - 0.60) |
| Lung condition           | 0.23 (0.20 - 0.27) | Lung condition           | 0.36 (0.33 - 0.39) | Cardiovascular diseases  | 0.36 (0.33 - 0.38) | Lung condition           | 0.36 (0.34 - 0.38) | Cardiovascular diseases  | 0.53 (0.48 - 0.59) |
| Diabetes                 | 0.22 (0.19 - 0.25) | Difficulty with ADLs     | 0.30 (0.25 - 0.35) | Diabetes                 | 0.22 (0.19 - 0.24) | Diabetes                 | 0.24 (0.22 - 0.26) | Dementia                 | 0.53 (0.38 - 0.67) |
| Health limits work       | 0.16 (0.13 - 0.20) | Cancer                   | 0.28 (0.25 - 0.31) | Lung condition           | 0.19 (0.16 - 0.21) | Cancer                   | 0.20 (0.19 - 0.22) | Mental health disorders  | 0.46 (0.40 - 0.52) |
| Cancer                   | 0.15 (0.13 - 0.18) | Diabetes                 | 0.11 (0.09 - 0.14) | Cancer                   | 0.17 (0.16 - 0.19) | Stroke                   | 0.14 (0.12 - 0.16) | Stroke                   | 0.37 (0.32 - 0.43) |
| Stroke                   | 0.05 (0.04 - 0.07) | Stroke                   | 0.04 (0.03 - 0.05) | Stroke                   | 0.06 (0.04 - 0.07) | Dementia                 | 0.04 (0.02 - 0.06) | Diabetes                 | 0.23 (0.19 - 0.28) |
| Difficulty with ADLs     | 0.02 (0.01 - 0.05) | Dementia                 | 0.02 (0.01 - 0.03) | Dementia                 | 0.00 (0.00 - 0.02) | Parkinson's disease      | 0.02 (0.01 - 0.03) | Cancer                   | 0.19 (0.15 - 0.24) |
| Parkinson's disease      | 0.00 (0.00 - 0.01) | Parkinson's disease      | 0.01 (0.00 - 0.02) | Parkinson's disease      | 0.00 (0.00 - 0.01) | Difficulty with mobility | 0.00 (0.00 - 0.00) | Lung condition           | 0.19 (0.15 - 0.23) |
| Dementia                 | 0.00 (0.00 - 0.00) | Hypertension             | 0.00 (0.00 - 0.00) | Hypertension             | 0.00 (0.00 - 1.00) | Health limit work        | 0.00 (0.00 - 0.00) | Parkinson disease        | 0.10 (0.07 - 0.13) |

\*ADL is a composite of 13 variables = difficulty dressing, including putting on shoes and socks, difficulty walking across a room, difficulty bathing or showering, difficulty eating, such as cutting up food, difficulty getting in and out of bed, difficulty using the toilet, including getting up or down, difficulty using map to figure out how to get around strange place, difficulty preparing a hot meal, difficulty shopping for groceries, difficulty making telephone calls, difficulty taking medications, difficulty doing work around house and garden, difficulty managing money, e.g. paying bills, keeping track expense

\*\*Mobility is a composite of 10 variables = difficulty walking 100 yards, difficulty sitting for 2 hours, difficulty getting up from a chair after sitting for long periods, difficulty climbing several flights of stairs without resting, difficulty climbing one flight of stairs without resting, difficulty stooping, kneeling or crouching, difficulty reaching or extending arms above shoulder level, difficulty pulling or pushing large objects, difficulty lifting or carrying weights over 10 pounds, difficulty picking up 5p coin from the table

**Supplementary Table 4.** Association of SCN/MLTC clusters with all-cause mortality.

|                                         | Alive |       | Dead |      | Adjusted OR | 95% CI     | p-value |
|-----------------------------------------|-------|-------|------|------|-------------|------------|---------|
|                                         | N     | %     | N    | %    |             |            |         |
| <b>Clusters</b>                         |       |       |      |      |             |            |         |
| Cluster 4                               | 4647  | 94.13 | 290  | 5.87 | Reference   |            |         |
| Cluster 1                               | 908   | 97.11 | 27   | 2.89 | 1.05        | 0.65-1.68  | 0.856   |
| Cluster 2                               | 1337  | 97.59 | 33   | 2.41 | 0.79        | 0.53-1.18  | 0.251   |
| Cluster 3                               | 2111  | 96.09 | 86   | 3.91 | 1.05        | 0.80-1.37  | 0.721   |
| Cluster 5                               | 524   | 89.27 | 63   | 10.7 | 1.07        | 0.80-1.47  | 0.678   |
| <b>Age (years)</b>                      |       |       |      |      |             |            |         |
| 50-59                                   | 1700  | 97.76 | 39   | 2.24 | Reference   |            |         |
| 60-69                                   | 2027  | 96.94 | 64   | 3.06 | 0.91        | 0.59-1.40  | 0.673   |
| 70-79                                   | 1598  | 90.03 | 177  | 9.97 | 2.82        | 1.88-4.22  | <0.0001 |
| 80+                                     | 704   | 79.64 | 180  | 20.3 | 6.78        | 4.44-10.40 | <0.0001 |
| <b>Sex</b>                              |       |       |      |      |             |            |         |
| Male                                    | 4,263 | 94.00 | 272  | 5.99 | Reference   |            |         |
| Female                                  | 5,264 | 95.87 | 227  | 4.13 | 0.52        | 0.42-0.64  | <0.0001 |
| <b>Ethnicity</b>                        |       |       |      |      |             |            |         |
| White                                   | 9,143 | 94.89 | 492  | 5.11 | Reference   |            |         |
| Non-white                               | 383   | 98.21 | 7    | 1.79 | 0.81        | 0.37-1.78  | 0.601   |
| <b>Marital status</b>                   |       |       |      |      |             |            |         |
| Married/ Partnered                      | 6,614 | 95.65 | 301  | 4.35 | Reference   |            |         |
| Separated/ Divorced/ Widowed            | 2,386 | 92.91 | 182  | 7.08 | 0.88        | 0.70-1.11  | 0.284   |
| Never married                           | 526   | 97.05 | 16   | 2.95 | 0.61        | 0.35-1.08  | 0.088   |
| <b>Education</b>                        |       |       |      |      |             |            |         |
| Less than upper secondary               | 3,491 | 93.09 | 259  | 6.91 | Reference   |            |         |
| Upper secondary and vocational training | 3,959 | 96.37 | 149  | 3.62 | 0.80        | 0.63-1.01  | 0.062   |
| Tertiary education                      | 1,213 | 96.12 | 49   | 3.88 | 0.95        | 0.67-1.37  | 0.798   |
| Other                                   | 767   | 94.93 | 41   | 5.07 | 0.86        | 0.60-1.23  | 0.406   |
| <b>Employment</b>                       |       |       |      |      |             |            |         |
| Not working                             | 6,085 | 92.90 | 465  | 7.09 | Reference   |            |         |
| Currently working                       | 3,440 | 99.05 | 33   | 0.95 | 0.39        | 0.25-0.60  | <0.0001 |

Adjusted for all sociodemographic variables when not stratified by these.

**Supplementary Table 5.** Association of SCN/MLTC clusters with nursing home admission.

|                                         | Alive |       | Dead |       | Adjusted OR | 95% CI    | p-value |
|-----------------------------------------|-------|-------|------|-------|-------------|-----------|---------|
|                                         | N     | %     | N    | %     |             |           |         |
| <b>Clusters</b>                         |       |       |      |       |             |           |         |
| Cluster 4                               | 222   | 75.77 | 71   | 24.23 | Reference   |           |         |
| Cluster 1                               | 26    | 96.30 | 1    | 3.70  | 0.38        | 0.05-3.13 | 0.371   |
| Cluster 2                               | 28    | 84.85 | 5    | 15.15 | 0.92        | 0.30-2.77 | 0.88    |
| Cluster 3                               | 71    | 82.56 | 15   | 17.44 | 0.81        | 0.41-1.60 | 0.542   |
| Cluster 5                               | 21    | 33.33 | 42   | 66.67 | 8.71        | 4.22-18   | <0.0001 |
| <b>Age (years)</b>                      |       |       |      |       |             |           |         |
| 50-59                                   | 35    | 89.74 | 4    | 10.26 | Reference   |           |         |
| 60-69                                   | 60    | 92.31 | 5    | 7.69  | 0.75        | 0.17-3.34 | 0.701   |
| 70-79                                   | 150   | 83.80 | 29   | 16.20 | 1.50        | 0.45-5.02 | 0.511   |
| 80+                                     | 97    | 53.89 | 83   | 46.11 | 4.34        | 1.31-14.3 | 0.016   |
| <b>Sex</b>                              |       |       |      |       |             |           |         |
| Male                                    | 219   | 80.22 | 54   | 19.78 | Reference   |           |         |
| Female                                  | 59.51 | 59.62 | 40.3 | 40.38 | 1.44        | 0.83-2.51 | 0.193   |
| <b>Ethnicity</b>                        |       |       |      |       |             |           |         |
| White                                   | 361   | 72.93 | 134  | 27.07 | Reference   |           |         |
| Non-white                               | 7     | 100.0 | 0    | 0.00  | NA          | NA        | NA      |
| <b>Marital status</b>                   |       |       |      |       |             |           |         |
| Married/ Partnered                      | 247   | 81.52 | 56   | 18.48 | Reference   |           |         |
| Separated/ Divorced/ Widowed            | 111   | 60.99 | 71   | 39.01 | 2.36        | 1.32-4.22 | 0.004   |
| Never married                           | 10    | 58.82 | 7    | 41.18 | 3.52        | 0.92-13.5 | 0.067   |
| <b>Education</b>                        |       |       |      |       |             |           |         |
| Less than upper secondary               | 184   | 70.50 | 77   | 29.50 | Reference   |           |         |
| Upper secondary and vocational training | 114   | 76.00 | 36   | 24.00 | 1.01        | 0.57-1.79 | 0.967   |
| Tertiary education                      | 41    | 83.67 | 8    | 16.33 | 0.62        | 0.22-1.77 | 0.373   |
| Other                                   | 28    | 68.29 | 13   | 31.71 | 0.90        | 0.36-2.26 | 0.829   |
| <b>Employment</b>                       |       |       |      |       |             |           |         |
| Not working                             | 338   | 72.22 | 130  | 27.78 | Reference   |           |         |
| Currently working                       | 30    | 90.91 | 3    | 9.09  | 0.70        | 0.17-2.84 | 0.614   |

Adjusted for all sociodemographic variables when not stratified by these.

**Supplementary Table 6.** Association of SCN/MLTC clusters with all-cause mortality considering the "healthiest" cluster as the reference group.

|                                         | Alive |       | Dead |      | Adjusted OR | 95% CI     | p-value |
|-----------------------------------------|-------|-------|------|------|-------------|------------|---------|
|                                         | N     | %     | N    | %    |             |            |         |
| <b>Clusters</b>                         |       |       |      |      |             |            |         |
| Cluster 1                               | 908   | 97.11 | 27   | 2.89 | Reference   |            |         |
| Cluster 2                               | 1,337 | 97.59 | 33   | 2.41 | 2.39        | 0.24-24.02 | 0.458   |
| Cluster 3                               | 2,111 | 96.09 | 86   | 3.91 | 2.10        | 0.24-18.19 | 0.499   |
| Cluster 4                               | 4,647 | 94.13 | 290  | 5.87 | 2.61        | 0.32-21.26 | 0.371   |
| Cluster 5                               | 524   | 89.27 | 63   | 10.7 | 22.7        | 2.59-198.4 | 0.005   |
| <b>Age (years)</b>                      |       |       |      |      |             |            |         |
| 50-59                                   | 1,700 | 97.79 | 39   | 2.24 | Reference   |            |         |
| 60-69                                   | 2,027 | 96.94 | 64   | 3.06 | 0.74        | 0.17-3.34  | 0.701   |
| 70-79                                   | 1,598 | 90.03 | 177  | 9.97 | 1.50        | 0.45-5.02  | 0.511   |
| 80+                                     | 704   | 79.64 | 180  | 20.4 | 4.34        | 1.31-14.33 | 0.016   |
| <b>Sex</b>                              |       |       |      |      |             |            |         |
| Male                                    | 4,263 | 94    | 272  | 6    | Reference   |            |         |
| Female                                  | 5,264 | 95.87 | 227  | 4.13 | 1.44        | 0.83-2.51  | 0.193   |
| <b>Ethnicity</b>                        |       |       |      |      |             |            |         |
| White                                   | 9,143 | 94.89 | 492  | 5.11 | Reference   |            |         |
| Non-white                               | 383   | 98.21 | 7    | 1.79 | NA          | NA         | NA      |
| <b>Marital status</b>                   |       |       |      |      |             |            |         |
| Married/ Partnered                      | 6,614 | 95.65 | 301  | 4.35 | Reference   |            |         |
| Separated/ Divorced/ Widowed            | 2,386 | 92.91 | 182  | 7.09 | 2.36        | 1.32-4.22  | 0.004   |
| Never married                           | 526   | 97.05 | 16   | 2.95 | 3.51        | 0.92-13.5  | 0.067   |
| <b>Education</b>                        |       |       |      |      |             |            |         |
| Less than upper secondary               | 3,491 | 93.09 | 259  | 6.91 | Reference   |            |         |
| Upper secondary and vocational training | 3,959 | 96.37 | 149  | 3.63 | 1.01        | 0.57-1.79  | 0.967   |
| Tertiary education                      | 1,213 | 96.12 | 49   | 3.88 | 0.62        | 0.22-1.77  | 0.373   |
| Other                                   | 767   | 94.93 | 41   | 5.07 | 0.90        | 0.36-2.26  | 0.829   |
| <b>Employment</b>                       |       |       |      |      |             |            |         |
| Not working                             | 6,085 | 92.9  | 465  | 7.10 | Reference   |            |         |
| Currently working                       | 3,440 | 99.05 | 33   | 0.95 | 0.69        | 0.17-2.84  | 0.614   |

Adjusted for all sociodemographic variables when not stratified by these.

**Supplementary Table 7.** Association of SCN/MLTC clusters with nursing home admission considering the "healthiest" cluster as the reference group.

|                                         | Alive |       | Dead |      | Adjusted OR | 95% CI    | p-value |
|-----------------------------------------|-------|-------|------|------|-------------|-----------|---------|
|                                         | N     | %     | N    | %    |             |           |         |
| <b>Clusters</b>                         |       |       |      |      |             |           |         |
| Cluster 1                               | 26    | 96.3  | 1    | 3.7  | Reference   |           |         |
| Cluster 2                               | 28    | 84.9  | 5    | 15.1 | 0.76        | 0.42-1.36 | 0.354   |
| Cluster 3                               | 71    | 82.6  | 15   | 17.4 | 1.00        | 0.60-1.67 | 0.986   |
| Cluster 4                               | 222   | 75.8  | 71   | 24.2 | 0.96        | 0.59-1.54 | 0.856   |
| Cluster 5                               | 21    | 33.3  | 42   | 66.7 | 1.02        | 0.59-1.77 | 0.935   |
| <b>Age (years)</b>                      |       |       |      |      |             |           |         |
| 50-59                                   | 35    | 89.7  | 4    | 10.3 | Reference   |           |         |
| 60-69                                   | 60    | 92.3  | 5    | 7.7  | 0.91        | 0.59-1.40 | 0.673   |
| 70-79                                   | 150   | 83.8  | 29   | 16.2 | 2.82        | 1.88-4.23 | <0.0001 |
| 80+                                     | 97    | 53.9  | 83   | 46.1 | 6.78        | 4.44-10.4 | <0.0001 |
| <b>Sex</b>                              |       |       |      |      |             |           |         |
| Male                                    | 219   | 80.22 | 54   | 19.8 | Reference   |           |         |
| Female                                  | 149   | 65.07 | 80   | 34.9 | 0.52        | 0.42-0.64 | <0.0001 |
| <b>Ethnicity</b>                        |       |       |      |      |             |           |         |
| White                                   | 361   | 72.93 | 134  | 27.1 | Reference   |           |         |
| Non-white                               | 7     | 100   | 0    | 0    | 0.81        | 0.67-1.78 | 0.601   |
| <b>Marital status</b>                   |       |       |      |      |             |           |         |
| Married/ Partnered                      | 247   | 81.52 | 56   | 18.5 | Reference   |           |         |
| Separated/ Divorced/ Widowed            | 111   | 60.99 | 71   | 39   | 0.88        | 0.70-1.11 | 0.284   |
| Never married                           | 10    | 58.82 | 7    | 41.2 | 0.61        | 0.35-1.08 | 0.088   |
| <b>Education</b>                        |       |       |      |      |             |           |         |
| Less than upper secondary               | 184   | 70.5  | 77   | 29.5 | Reference   |           |         |
| Upper secondary and vocational training | 114   | 76    | 36   | 24   | 0.80        | 0.63-1.01 | 0.062   |
| Tertiary education                      | 41    | 83.67 | 8    | 16.3 | 0.95        | 0.67-1.36 | 0.798   |
| Other                                   | 28    | 68.29 | 13   | 31.7 | 0.86        | 0.60-1.23 | 0.406   |
| <b>Employment</b>                       |       |       |      |      |             |           |         |
| Not working                             | 338   | 72.22 | 130  | 27.8 | Reference   |           |         |
| Currently working                       | 30    | 90.91 | 3    | 9.09 | 0.39        | 0.25-0.60 | <0.0001 |

Adjusted for all sociodemographic variables when not stratified by these.
